1 **Title:** Potent synthetic nanobodies against SARS-CoV-2 and molecular basis for  
2 neutralization

3

4

5 **Short title:** Nanobody neutralizers for SARS-CoV-2

6

7

8 **One sentence summary:** Structural and biochemical studies revealed the molecular  
9 basis for the neutralization mechanism of *in vitro*-selected and rationally designed  
10 nanobody neutralizers for SARS-CoV-2 pseudovirus.

11

12

13 **Authors:** Tingting Li<sup>1,#</sup>, Hongmin Cai<sup>1,#</sup>, Hebang Yao<sup>1,#</sup>, Bingjie Zhou<sup>2,#</sup>, Yapei Zhao<sup>2</sup>,  
14 Wenming Qin<sup>3</sup>, Cedric A.J. Hutter<sup>4</sup>, Yanling Lai<sup>1</sup>, Juan Bao<sup>1</sup>, Jiaming Lan<sup>2</sup>, Gary Wong<sup>2</sup>,  
15 Markus Seeger<sup>4</sup>, Dimitri Lavillette<sup>2,5\*</sup>, Dianfan Li<sup>1,\*</sup>

16

17

18 **Affiliation:** <sup>1</sup>State Key Laboratory of Molecular Biology, CAS Center for Excellence in  
19 Molecular Cell Science, National Center for Protein Science Shanghai, Shanghai  
20 Institute of Biochemistry and Cell Biology, University of Chinese Academy of Sciences,  
21 Chinese Academy of Sciences, 333 Haik Road, Shanghai 201210, China.

22

23 <sup>2</sup>CAS Key Laboratory of Molecular Virology & Immunology, Institut Pasteur of Shanghai,  
24 University of Chinese Academy of Sciences, Chinese Academy of Sciences, 320 Yueyang  
25 Road, Shanghai 200031, China.

26

27 <sup>3</sup>National Facility for Protein Science in Shanghai, Shanghai Advanced Research  
28 Institute (Zhangjiang Laboratory), Chinese Academy of Sciences, Shanghai, 201210,  
29 China.

30

31 <sup>4</sup>Institute of Medical Microbiology, University of Zurich, Zurich, Switzerland.

32

33 <sup>5</sup>Pasteurien College, Soochow University, Jiangsu, China.

34

35

36 **\*Correspondence:** [dianfan.li@sibcb.ac.cn](mailto:dianfan.li@sibcb.ac.cn); [dlaville@ips.ac.cn](mailto:dlaville@ips.ac.cn)

37 **ABSTRACT**

38 SARS-CoV-2, the Covid-19 causative virus, adheres to human cells through  
39 binding of its envelope Spike protein to the receptor ACE2. The Spike receptor-binding  
40 domain (S-RBD) mediates this key event and thus is a primary target for therapeutic  
41 neutralizing antibodies to mask the ACE2-interacting interface. Here, we generated 99  
42 synthetic nanobodies (sybodies) using ribosome and phage display. The best sybody  
43 MR3 binds the RBD with  $K_D$  of 1.0 nM and neutralizes SARS-CoV-2 pseudovirus with  
44  $IC_{50}$  of  $0.40 \mu\text{g mL}^{-1}$ . Crystal structures of two sybody-RBD complexes reveal a common  
45 neutralizing mechanism through which the RBD-ACE2 interaction is competitively  
46 inhibited by sybodies. The structures allowed the rational design of a mutant with  
47 higher affinity and improved neutralization efficiency by  $\sim 24$ -folds, lowering the  $IC_{50}$   
48 from  $12.32$  to  $0.50 \mu\text{g mL}^{-1}$ . Further, the structures explain the selectivity of sybodies  
49 between SARS-CoV strains. Our work presents an alternative approach to generate  
50 neutralizers against newly emerged viruses.

## 51 INTRODUCTION

52 The coronavirus disease emerged in early December 2019 (Covid-19) is posing a  
53 global health crisis (1). First reported in Wuhan, China (2), the pneumonia disease has  
54 spread worldwide and caused an official number of >7 million infections and >400,000  
55 death as of the middle of June 2020. The causative agent, named as severe acute  
56 respiratory syndrome coronavirus 2 (SARS-CoV-2), is the sixth coronavirus to cause  
57 human fatalities, among the previous SARS-CoV (3) and the Middle East respiratory  
58 syndrome (MERS)-CoV (4, 5). Compared to SARS-CoV, SARS-CoV-2 has evolutionally  
59 perfected for spreading with characteristics of lower fatality, higher transmitting  
60 efficiency, and higher occurrence of asymptomatic patients and hence higher risk for  
61 unknowing spread (6).

62  
63 Prompt responses in the science community have shed mechanistic insights into  
64 its high infectivity. Much of it is associated with its Spike protein (S), a heavily  
65 glycosylated, homotrimeric type-I membrane protein on the viral envelop that makes  
66 the corona-shaped 'spikes' on the surface (7, 8). During the infection, S is cleaved by  
67 host proteases (9, 10), yielding the N-terminal S1 and the C-terminal S2 subunit. S1  
68 binds to ACE2 (11-14) on the host cell membrane via its receptor-binding domain  
69 (RBD), causing conformational changes that triggers a secondary cleavage needed for  
70 the S2-mediated membrane fusion at the plasma membrane or in the endosome..  
71 Several independent structural studies have revealed that the SARS-CoV-2 RBD binds  
72 the receptor ACE2 with a 10-20 times higher affinity than SARS-CoV (11-13). This,  
73 together with the fact that the SARS-CoV-2 S protein is more prone to proteolysis (7,  
74 15), may explain its high infectivity.

75  
76 Despite fast research actions and progress, currently, there is no clinically  
77 available vaccines or drugs against SARS-CoV-2. Developing therapeutics, including  
78 neutralizing antibodies, has been a high priority for research globally. Because of its  
79 key role for viral attachment, the RBD has been a primary target for neutralizing  
80 strategies to block its binding to ACE2. In the past, several neutralizing antibodies  
81 isolated from recovered SARS (16-19) and MERS (19-21) patients have been found to  
82 bind the RBD. Similarly, several neutralizing antibodies recently identified from  
83 convalescent plasma in several independent studies (22-24) have been shown to  
84 suppress viral entry by blocking the RBD-ACE2 interactions. Altogether, these results  
85 demonstrate the RBD is a hot-spot to generate effective neutralizers for SARS-CoV-2.

86  
87 Single-domain antibodies (nanobodies) found in llama and sharks contain only  
88 the heavy chain, yet they can bind antigen with affinities similar to the conventional

89 antibodies (25). Because the variable fragment is small (~14 kDa), it may access regions  
90 that are sterically hindered for bulkier two-chain antibodies. Additionally, as  
91 monomers and normally nonglycosylated, nanobodies are generally more heat stable,  
92 easier to produce (can be produced in bacteria), and more amenable to protein  
93 engineering than conventional antibodies (25). Recently, three highly diverse libraries  
94 of synthetic nanobodies (sybodies) have been rationally designed. Compared to  
95 immunization, the selection from sybody libraries offers quicker selection, making it  
96 possible to obtain nano-molar affinity antibodies in 2-3 weeks (26, 27). This  
97 accelerated pace is most attractive in cases to develop antibodies against newly  
98 emerged and quick spreading diseases like Covid-19. In addition, unlike for the  
99 isolation of antibodies from recovered patients, the *in vitro* selection does not require  
100 access to high-level biosafety labs or hospital resources, enabling early-stage antibody  
101 discovery by a wider research community.

102

103 Here, we generated 99 unique sybodies against the SARS-CoV2 S-RBD from three  
104 libraries using a combination of ribosome display and phage display. The best sybody  
105 MR3 binds the RBD with a  $K_D$  of 1.0 nM and neutralizes SARS-CoV-2 pseudovirus with  
106 an  $IC_{50}$  of 0.40  $\mu\text{g mL}^{-1}$ . We determined the structures of two sybody-RBD complexes,  
107 revealing that they block virus infection by competing with ACE2 for RBD-binding. The  
108 structures also enabled the rational design of an improved version of MR17, lowering  
109 the  $IC_{50}$  from 12.32 to 0.50 ( $\mu\text{g mL}^{-1}$ ). Our results pave the way to the development of  
110 therapeutic nanobodies to fight Covid-19.

111

## 112 RESULTS AND DISCUSSION

### 113 Sybody selection against the SARS-CoV-2 receptor-binding domain

114 SARS-CoV-2 S-RBD binders were selected by performing one round of ribosome  
115 display using three high-diversity libraries (Concave, Loop, and Convex) (26, 27), and  
116 three rounds of phage display using the biotinylated RBD as the bait under increasingly  
117 stringent selection conditions with the last selection at 5 nM RBD. To eliminate binders  
118 with fast off-rates, libraries were challenged with the non-biotinylated RBD during the  
119 panning process (27). After panning, 95 colonies for each of the three libraries were  
120 screened by ELISA (**Fig. S1A**) with the unrelated maltose-binding protein (MBP) as a  
121 control. A 1.5-fold (RBD:MBP) signal cut-off identified 80, 77, and 90 positive clones,  
122 corresponding to 62, 19, and 18 unique binders from the Concave, Loop, and Convex  
123 library, respectively (**Table S1**). The high redundancy in the Loop and Convex library  
124 suggests that the panning strategy was strict and that binders from the last round were  
125 sampled adequately.

126 Remarkably, no overlap of binders was found between the current study and an  
127 independent parallel study with the same libraries (28) despite that both studies  
128 reported internal redundancy. It is noted that the two studies used slightly different  
129 constructs and strategies; still, this statistically unexpected non-overlap reflects the  
130 high diversity of the synthetic sybody libraries.

131

132 Eighty 'first-comers' of the sequencing results for the 247 ELISA-positive colonies  
133 were further screened by a fluorescence-detector size exclusion chromatography  
134 (FSEC) assay to identify sybodies that can bind the RBD at a low concentration of 500  
135 nM using crude extract from sybody-expressing clones. The assay identified 9 Concave  
136 (21%), 9 Loop (50%), and 10 Convex (56%) sybodies that caused earlier retention of  
137 the fluorescein-labeled RBD (**Fig. S2A-2D, Table S1**). Overall, the FSEC-positive clones  
138 numbered 28 (36%). Although the Concave pool was more diverse, it had the lowest  
139 positive rate.

140

141 We picked 9 FSEC-positive sybodies with various ELISA-redundancies for  
142 preparative purification (**Fig. S2E-2H**) and crystallization. They include SR4 (1), SR34 (2),  
143 SR38 (2), MR3 (31), MR4 (9), MR6 (3), MR17 (1), LR1 (31), and LR5 (19) (S, M, L refers  
144 to Concave, Loop, and Convex sybodies respectively; brackets indicate ELISA  
145 redundancy). All sybodies co-eluted with the RBD (**Fig. S2E-2H**), confirming the  
146 formation of sybody-RBD complexes. Based on the crystallization outcome (**Fig. S3**),  
147 four sybodies, namely SR4, MR3, MR4, and MR17, were selected for biochemical  
148 characterization.

149

150 As designed (26), the four sybodies all displayed ultra-high thermostability (**Fig. 1,**  
151 **Fig. S4**). This could mean prolonged shelf life should they be useful for medical  
152 applications. The binding kinetics between sybodies and the RBD was assessed using  
153 bio-layer interferometry (29). As shown in **Fig. 1**, the  $K_D$  values ranged from 83.7 nM  
154 (MR17) to 1.0 nM (MR3). Consistent with its highest affinity, MR3 showed the slowest  
155 off-rate ( $2.3 \times 10^{-4} \text{ s}^{-1}$ ). Taken together, the selection strategy yielded high-affinity  
156 binders that were ultra-stable.

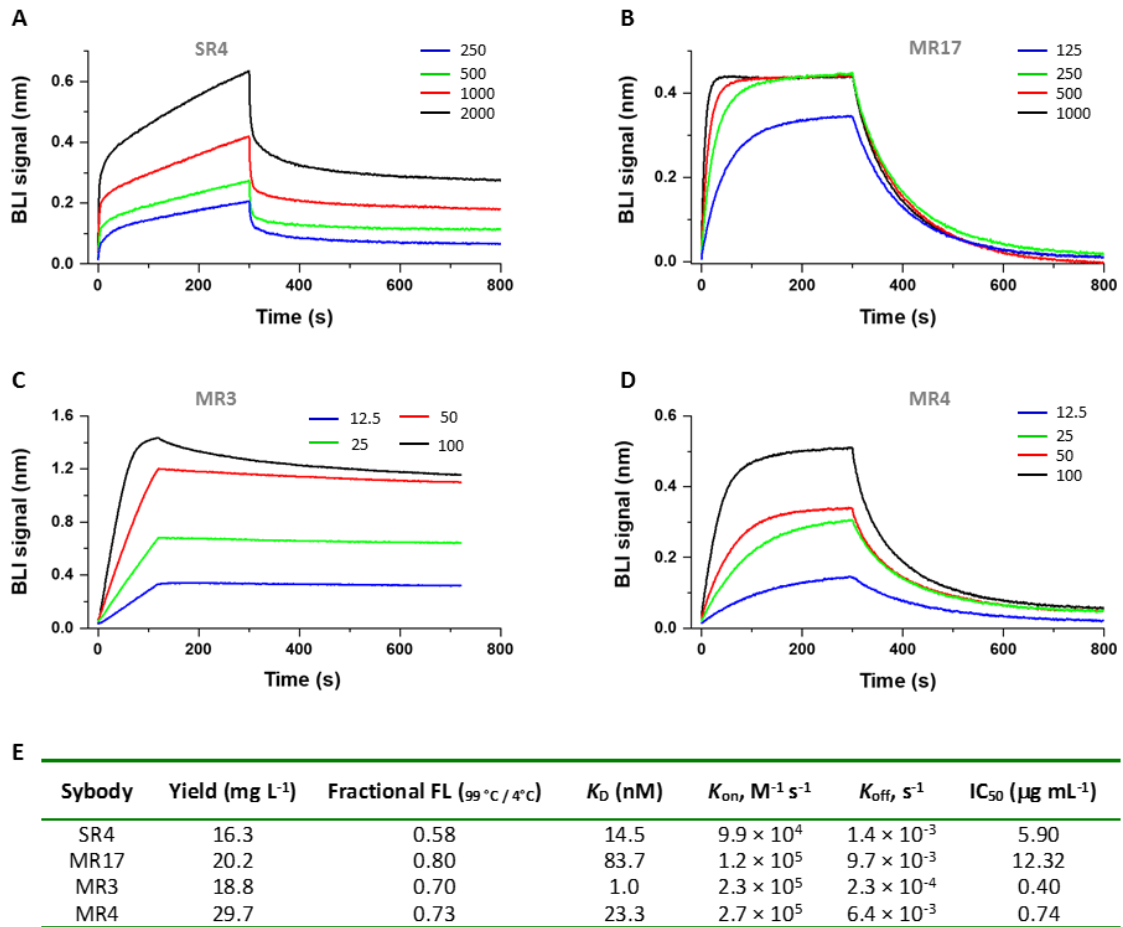

157

158 **Fig. 1. Characterization of RBD nanobody binders.** (A-D) Kinetics for sybody-RBD  
 159 binding by bio-layer interferometry (BLI) assay. Biotinylated RBD immobilized on a  
 160 streptavidin-coated sensor was titrated with various concentrations (nM) of sybodies  
 161 as indicated. Data were fitted using the built-in software Data Analysis 10.0 with a 1:1  
 162 stoichiometry. (E) A summary of the characterization of the four sybodies. Yield refers  
 163 to the amount of pure sybodies from 1 L of culture. Fractional fluorescence (FL)  
 164 indicates remaining gel filtration peak intensity of sybodies after heating at 99 °C for  
 165 20 min (Fig. S4A-4D). The binding kinetics are from (A-D). IC<sub>50</sub> values are from Fig. 2.

166

### 167 Neutralizing activity of sybodies

168

169 We next tested the capacity of sybodies to inhibit entry of retroviral pseudotypes  
 170 harboring the SARS-CoV-2 Spike protein. Using 50% neutralization at 1 μM  
 171 concentration as a cut-off, 11 Concave (26%), 13 Loop (68%), and 10 Convex (56%)  
 172 sybodies were identified as positive (Fig. S5A). Thus, nearly a half of the tested  
 173 sybodies showed neutralizing activity against SARS-CoV-2 pseudovirus according to

174 the abovementioned criterion. Interestingly, none of the sybodies showed noticeable  
175 neutralization activities for the closely related SARS-CoV pseudovirus (**Fig. S5B**),  
176 indicating high specificity.  
177  
178

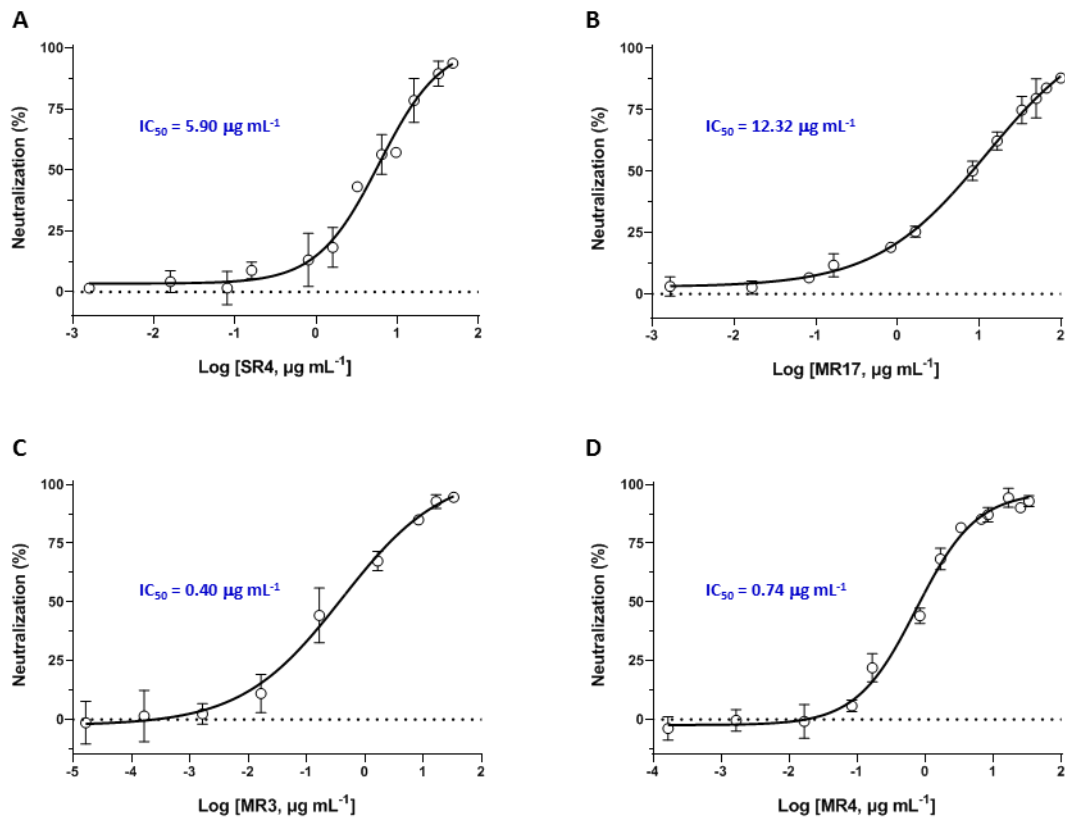

179 **Fig. 2. Neutralization activity of sybodies against SARS-CoV-2 pseudovirus.** (A-D)  
180 Pseudoviral particles were preincubated with different concentration of indicated  
181 sybodies before infection of VeroE6-hACE2 cells. The rate of infection was measure by  
182 fluorescence-activated cell sorting (FACS). IC<sub>50</sub> was obtained by Sigmoid fit of the  
183 percentage neutralization. Data are from three independent experiments.

184

185 Although the number of ELISA hits was less in the Loop and Convex libraries (**Fig.**  
186 **S1**), the positive rate for neutralization was much higher than the Concave library – a  
187 consistent trend observed in the FSEC analysis (**Table S1**). It is possible that, for the  
188 Concave library, the panning conditions were not strict enough to eliminate binders  
189 with high-off rates or low affinities. This would justify a stricter panning process for the  
190 Concave library to increase the quality of the binders at the cost of diversity.  
191 Alternatively, the Concave sybodies may intrinsically be different from the other two  
192 pools and they may have preference for some other epitopes not overlapping with the  
193 ACE-binding site.

194 IC<sub>50</sub> values of the four sybodies were determined to be 5.90 µg mL<sup>-1</sup> for SR4, 12.32  
195 µg mL<sup>-1</sup> for MR17, 0.40 µg mL<sup>-1</sup> for MR3, and 0.74 µg mL<sup>-1</sup> for MR4 (**Fig. 2**).

196

### 197 **Crystal structure of two sybody-RBD complexes**

198 To elucidate the molecular basis for neutralization, we set to determine the  
199 structures for the four RBD-sybody complexes using X-ray crystallography. MR4-RBD  
200 crystals formed clustered needles (**Fig. S3**) and were not tested. Crystals for MR3-RBD,  
201 even after several rounds of optimization with multiple constructs (myc-tagged,  
202 tagless (26), and a recently reported “macrobody” version of MBP-fusion (30)), did not  
203 diffract beyond 7 Å. Therefore, the focus for structural studies was shifted to SR4 and  
204 MR17.

205

206 Crystals for SR4-RBD and MR17-RBD yielded data sets at 2.15 Å and 2.77 Å,  
207 respectively (**Table S2**). The structures were solved using molecular replacement with  
208 the published RBD structure (PDB ID 6M0J) (11) and a sybody structure (PDB ID 5M13)  
209 (26) as search models. The SR4-RBD and MR17-RBD structures were refined to  
210  $R_{\text{work}}/R_{\text{free}}$  of 0.1836/0.2239 and 0.2029/0.2659, respectively. The asymmetric unit  
211 contained one RBD and one sybody molecule for both complexes, meaning a 1:1  
212 stoichiometry which was consistent with the bio-layer interferometry results.

213

214 The RBD structure resembles a short backrest high chair and SR4 binds to it at  
215 both the seat and backrest part (**Fig. 3A**). A PISA (31) analysis showed a 727.37 Å<sup>2</sup>  
216 surface area for the SR4-RBD interface with modest electrostatic complementarity (**Fig.**  
217 **3A, Fig. S6A**). Structural alignment of the SR4-RBD complex with the RBD-ACE2 crystal  
218 structure revealed that SR4-binding did not cause noticeable conformational changes  
219 of the RBD (**Fig. S7**) with the RMSD value of 0.370 Å. All three CDRs contributed to the  
220 binding through hydrophobic interactions and H-bonding that involves both sidechains  
221 and mainchains (**Fig. 3B, 3C**). In addition, Tyr37, which is at the framework region, also  
222 participated binding by forming an H-bond with the RBD Gly447 backbone. Of note,  
223 SR4 binds sideways, as intended by design of the Concave sybody library (26).



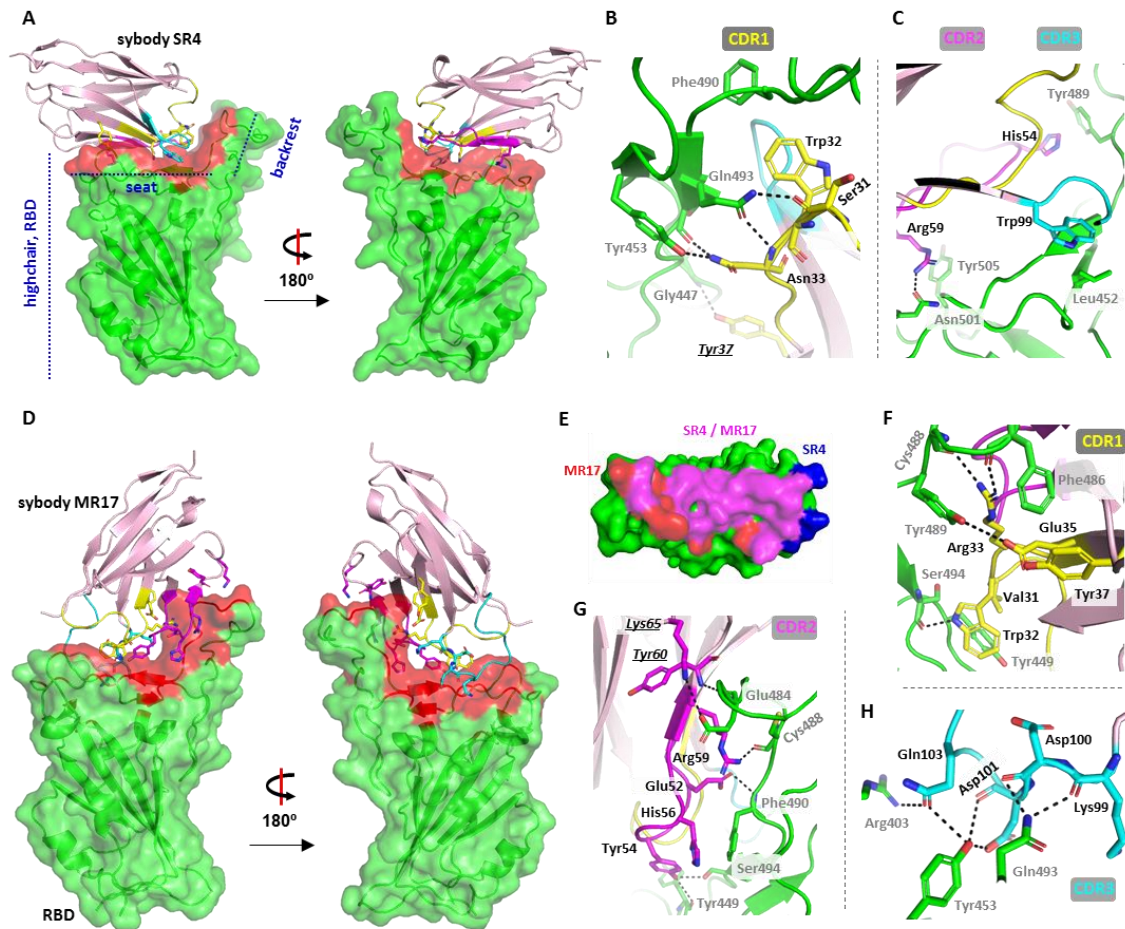

224

225 **Fig. 3. Crystal structure of two sybody-RBD complexes.** (A) The overall structure of  
 226 SR4 (pink cartoon) bound with RBD (green surface) which resembles a short backrest  
 227 high chair. The binding surface is highlighted red. (B,C) Interactions between SR4 and  
 228 the RBD (green) contributed by CDR1 (yellow), CDR2 (magenta), and CDR3 (cyan). The  
 229 framework residue Tyr37 involved in the interactions is shown underlining italic. (D)  
 230 The overall structure of the MR17-RBD complex. Color-coding is the same as in A. (E)  
 231 The overlap between the SR4- and MR17-interacting surfaces. (F-H). Interactions  
 232 between MR17 and the RBD (green) contributed by CDR1 (yellow), CDR2 (magenta),  
 233 and CDR3 (cyan). The framework Lys65 and Tyr60 participated in the binding are  
 234 shown underling italic. Dashed lines indicate H-bonding or salt-bridges between atoms  
 235 that are <4.0 Å apart. Labels for sybody residues are colored black and labels for the  
 236 RBD residues are colored grey.

237

238

239 MR17 also binds to the RBD at the 'seat' and 'backrest' regions but approaches  
 240 the RBD an almost perfect opposite direction of SR4 (Fig. 3D, Fig. S8), indicating  
 241 divergent binding mode for these synthetic nanobodies. The binding of MR17 to the

242 RBD occurred on a 853.94 Å<sup>2</sup> surface area with noticeable electrostatic  
243 complementarity (**Fig. S6B**). Interestingly, this surface was largely shared with the SR4  
244 binding surface (**Fig. 3E**). Similar to SR4, MR17 did not cause noticeable conformational  
245 changes of the RBD (RMSD of 0.508 Å) (**Fig. S7**), except for a small flip at the ‘backrest’  
246 part of the RBD. The interactions between MR17 and the RBD were mainly mediated  
247 by H-bonding (**Fig. 3F-3H**). Apart from the three CDRs, the framework Lys65 and Tyr60  
248 participated in RBD-binding by salt-bridging with the sidechain and H-bonding with  
249 the mainchain of Glu484, respectively.

250

### 251 **Molecular basis for neutralization**

252 Neutralizing antibodies may interact with different parts of the S protein and thus  
253 blocks viral entry through different mechanisms (7, 19, 22, 23, 32). Because the current  
254 project was designed to select sybodies against the receptor-binding domain of S  
255 protein, the neutralizers were expected to suppress ACE2 binding by competing for the  
256 binding surface, by steric hindrance for ACE2 binding, or by deforming the ACE2  
257 binding surface. Superposing the structure of the sybody-RBD complexes to the RBD-  
258 ACE2 (PDB ID 6M0J) (11) revealed that they both bind the RBD at the interface where  
259 the receptor ACE2 binds (**Fig. 4A, 4B**). Aligning the sybody-RBD structures to the full-  
260 length S protein (7) showed no steric hindrance for the sybody in binding to the ‘up’  
261 conformation of the RBD in the ‘open’ prefusion state of S protein (**Fig. 4C, 4D**). In  
262 addition, the sybodies may be able to bind S protein in its ‘closed’ state due to their  
263 small sizes. Indeed, little clashes were observed when SR4/MR17 were aligned onto  
264 the S protein in its ‘closed’ conformation (**Fig. S9**).

265

266 Consistent with the structural observations, the RBD-ACE2 binding can be  
267 disrupted by sybodies SR4, MR17, MR3, and MR4 to various degrees (**Fig. 4E-4H**).  
268 Therefore, we conclude that SR4/MR17, and perhaps MR3/MR4 too, block the viral  
269 entry by masking the ACE2-binding surface of the RBD thus preventing the recognition  
270 between viral particles and host cells.

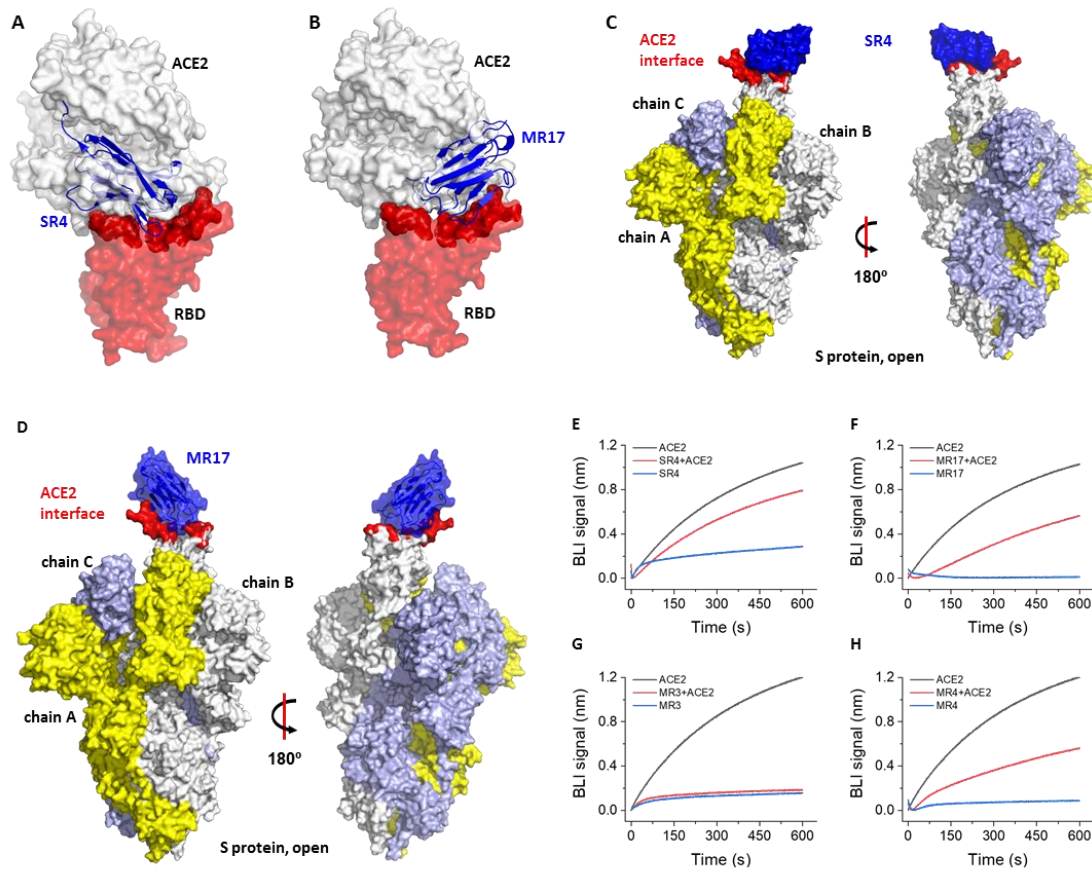

271

272 **Fig. 4. Molecular basis for neutralization.** (A) Alignment of the SR4-RBD structure to  
273 the ACE2-RBD structure (PDB ID 6M0J) (11) reveals that SR4 (blue) binds RBD (red) at  
274 the ACE2-binding site (dark red). The receptor ACE2 is shown as a white surface. (B)  
275 Alignment of the SR4-RBD structure to the ACE2-RBD structure (PDB ID 6M0J) (11)  
276 reveals that MR17 binds the RBD at the ACE2-binding site. The color coding is the same  
277 as in A. (C,D) Alignment of the SR4-RBD (C) and MR17-RBD (D) to the 'up' conformation  
278 of the RBD from the cryo-EM structure of the full-length S protein (PDB ID 6VYB) (7).  
279 (E-H) Competitive binding for the RBD between sybody and ACE2. A sensor coated with  
280 streptavidin was saturated with 1  $\mu\text{M}$  of biotinylated RBD. The sensor was then soaked  
281 in 50 nM of sybody with (red) or without 25 nM of ACE2 (blue) for bio-layer  
282 interferometry (BLI) assays. As a control, the ACE2-RBD interaction was monitored  
283 using sensors without sybody incubation (black).

284

### 285 An improved MR17 mutant by structure-based design

286 The neutralizing activity of MR17 was modest ( $\text{IC}_{50}$  of  $12.32 \mu\text{g mL}^{-1}$ , Fig. 2B). To  
287 improve its neutralizing potency, we designed 19 single mutants based on the MR17-  
288 RBD structure (see Methods). A neutralization assay identified K99Y with higher  
289 potency than the wild-type MR17 (Fig. S10), and the rationale for its design is

290 described below. As shown in **Fig. 3H**, few hydrophobic interactions were observed  
291 between MR17 and the RBD even though 5 of the 12 amino acids in the CDR3 are  
292 hydrophobic (K<sup>99</sup>DDGQLAYHYDY<sup>110</sup>, hydrophobic residues are underlined). Intriguingly,  
293 the RBD contains a hydrophobic patch at where CDR3 was oriented; and this patch is  
294 adjacent to an overall positively-charged surface (**Fig. 5A**). However, the MR17 residue  
295 poking into this patch is a positively charged residue, namely Lys99 (**Fig. 5B**) which  
296 would be unfavorable because of electrostatic repel and/or hydrophobic-hydrophilic  
297 repel. Thus, it was proposed that a hydrophobic replacement should strengthen the  
298 interactions. According to the original library design, Lys99 was unvaried (26), meaning  
299 that Lys99 was not *selected* and hence offering opportunities for optimization. The  
300 analysis encouraged the design of the K99Y mutation to match this hydrophobic  
301 microenvironment.

302

303 As shown in **Fig. 5C**, the single mutation increased the binding affinity by 1.5 fold  
304 and decreased the off-rate by 2.8 fold. Consistent with this trend, MR17-K99Y  
305 displayed a remarkable 24-fold increase of neutralization efficiency, with an IC<sub>50</sub> value  
306 (0.50 µg mL<sup>-1</sup>) (**Fig. 5D**) comparable to the best sybody MR3 (**Fig. 1E, Fig. 2C**). As  
307 expected, Tyr99 was indeed in close contact with the hydrophobic patch, as revealed  
308 by the crystal structure of MR17-K99Y (**Fig. 5E, Table S2**). Based on the improvements,  
309 we further designed K99W. K99W showed similar neutralization activities with the  
310 wild-type MR17 (**Fig. S10**); it may be that the bulky side chain of tryptophan caused  
311 clashes with the hydrophobic pocket. Altogether, the mutagenesis work not only  
312 yielded to an improved neutralizing sybody but also provided validation of the  
313 structure and neutralization mechanism of MR17.

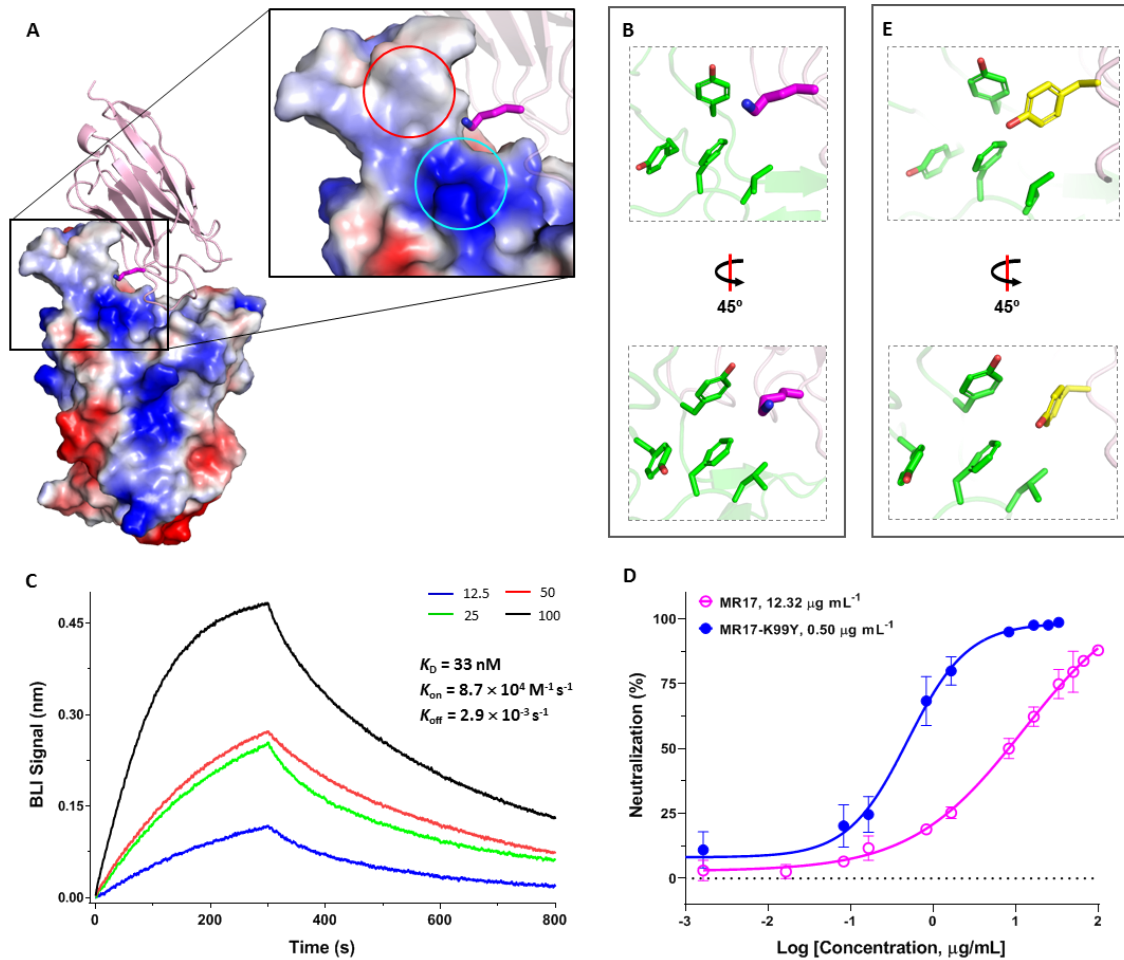

314

315 **Fig. 5. Rational design of a sybody mutant with increased RBD binding affinity and**  
316 **higher neutralizing activity.** (A) The overall structure and the expanded view of MR17  
317 (pink cartoon) in complex with the RBD (electrostatic surface). Lys99 on CDR3  
318 (magenta carbon atoms) is poking to an overall positively charged area (cyan circle)  
319 which is also adjacent to a hydrophobic patch (red circle). (B) Lys99 from MR17  
320 (magenta) is situated in a hydrophobic patch. (C) Binding kinetics between MR17-K99Y  
321 and the RBD. Biotinylated RBD immobilized on a streptavidin-coated sensor was  
322 titrated with various concentrations (nM) of MR17-K99Y as indicated. Data were fitted  
323 using the built-in software Data Analysis 10.0 with a 1:1 stoichiometry. (D)  
324 Neutralization assay of MR17-K99Y (closed circle) using SARS-CoV-2 pseudovirus  
325 shows improved neutralizing efficiency compared to the MR17 wild-type (open circle).  
326 Data are from three independent experiments. (E) Crystal structure of MR17-K99Y  
327 shows that Tyr99 matches the hydrophobic microenvironment.

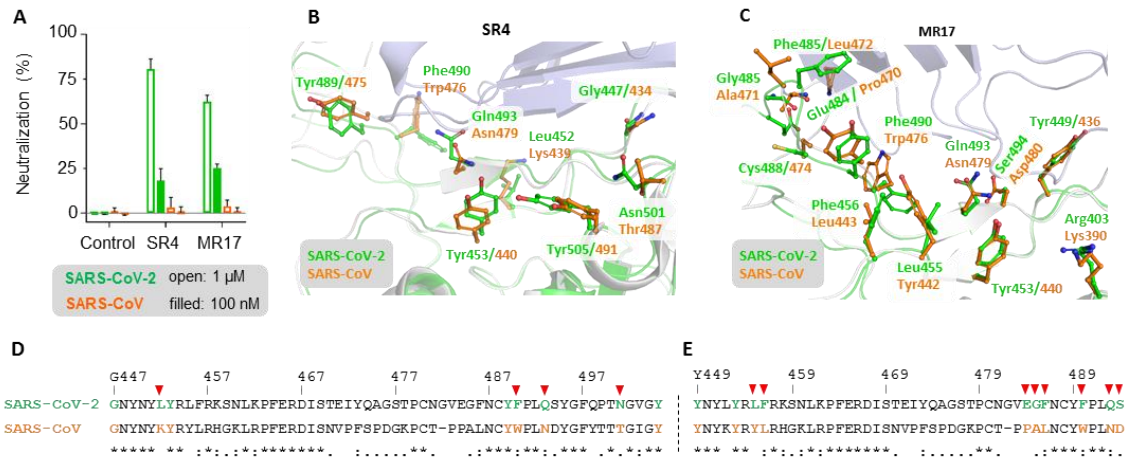

328

329 **Fig. 6. Structural basis for neutralization selectivity.** (A) Selectivity of the SR4 and  
 330 MR17 in neutralizing the two SARS-CoV pseudoviruses. Neutralization assays were  
 331 conducted using SARS-CoV (magenta) and SARS-CoV-2 (green) pseudotypes with 2  
 332 concentrations of sybodies (1  $\mu$ M and 100 nM). Error bar represents standard  
 333 deviation of data from three independent experiments. (B, C) The structure of SR4-  
 334 RBD (B) and MR17-RBD (C) are aligned to the SARS-CoV RBD in a neutralizer-bound  
 335 form (16). SR4 is shown as light blue cartoon. The SARS-CoV-2 RBD is colored green.  
 336 The SARS-CoV RBD is shown as white cartoon with the aligned residues shown as  
 337 orange sticks. (D,E) Sequence alignment between the two RBDs from SARS-CoV-2 and  
 338 SARS-CoV in the epitope for SR4 (D) and MR17 (E). Residues from the SARS-CoV-2 RBD  
 339 are numbered above the sequence. The SARS-CoV-2 RBD residues involved in the  
 340 binding are colored green, and the corresponding residues in the SARS-CoV RBD are  
 341 colored orange, as in B and C. Red triangles above the sequence indicate differences  
 342 between the two RBDs in the epitope. Asterisks mark identical residues, colons refer  
 343 to conserved residues, and single dots indicate modestly conserved residues.

344

### 345 Structural basis for neutralization specificity

346 Cross-activities of neutralizing activities have been reported for antibodies  
 347 between SARS-CoV and SARS-CoV-2 (7, 33, 34) because the S-RBDs from the two  
 348 viruses are highly similar, with 74.3% identity and 81.7% similarity. However, none of  
 349 the SARS-CoV-2 sybody neutralizers (Fig. 6A, Fig. S5, Fig. S10) showed noticeable  
 350 neutralizing activity for SARS-CoV, even at 1  $\mu$ M concentration. To find out structural  
 351 mechanisms for the functional selectivity, we compared the SARS-CoV-2 RBD  
 352 structures in SR4- and MR17-bound form with the SARS-CoV RBD also in a neutralizer-  
 353 binding form (PDB ID 2dd8) (16). Although the two RBDs are overall very similar (Fig.  
 354 S11), the residues involved in sybody recognition are not conserved between the two

355 **(Fig. 6B-6E)**. Specifically, half of the eight SR4-interacting residues and 9 of 12 MR17-  
356 interacting residues are different between the two RBDs. Although some of these  
357 residues interacted with the sybodies via their mainchain amides and carbonyls, the  
358 side chain differences can still cause slight changes in mainchain orientation. Because  
359 nanobodies mostly recognize three-dimensionally organized epitopes (as was the case  
360 here) and the recognition is conformation sensitive, such small changes might be  
361 enough to diminish antibody-antigen interactions, thus leading to the observed  
362 selectivity.

363

364 In summary, we have generated potent synthetic nanobodies which neutralize  
365 SARS-CoV-2 pseudoviruses efficiently and selectively. We anticipate the selection  
366 strategy be useful to quickly respond to similar crises should they arise in the future.

367

## 368 **ACKNOWLEDGMENTS**

369 We thank the staff members of the Large-scale Protein Preparation System for  
370 equipment maintenance and management. We thank Dr. Zhipu Luo at Soochow  
371 University (China) for helpful discussions regarding data processing. This work has  
372 been supported by the Key Program of CAS Frontier Science (QYZDB-SSW-SMC037,  
373 D.Li), the Strategic Priority Research Program of the Chinese Academy of Sciences  
374 (XDB37020204, D.Li), CAS Facility-based Open Research Program, the National Natural  
375 Science Foundation of China (31870726, D.Li), the One Belt and One Road major  
376 project for infectious diseases (2018ZX10101004-003, J.L.), National Key R&D Program  
377 of China (2020YFC0845900, D.La), and Shanghai Municipal Science and Technology  
378 Major Project (20431900402, D.La).

379

## 380 **AUTHOR CONTRIBUTIONS**

381 T.L., H.C., and H.Y. selected sybodies under the supervision of C.A.J.H. and M.A.S..  
382 T.L., H.C., and H.Y. purified and crystalized protein complexes with assistance from Y.L..  
383 H.Y. biochemically characterized sybodies. B.Z. and Y.Z. performed neutralization  
384 assays under the supervision of D.La. W.Q. collected X-ray diffraction data. B.J. helped  
385 with molecular cloning. J.L. and G.W. developed reagents for the neutralizing assays.  
386 D.Li. conceived the project, solved the structures, analyzed data, and wrote the  
387 manuscript with inputs from H.Y., T.L., H.C., B.Z., M.A.S., and D.La.

388

## 389 **CONFLICT OF INTEREST**

390 The authors declare no conflict of interest.

391 **REFERENCES**

392

- 393 1. M. Nicola, Z. Alsafi, C. Sohrabi, A. Kerwan, A. Al-Jabir, C. Iosifidis, M. Agha, R. Agha,  
394 The socio-economic implications of the coronavirus pandemic (COVID-19): A review.  
395 *Int J Surg* **78**, 185-193 (2020).
- 396 2. C. Wang, P. W. Horby, F. G. Hayden, G. F. Gao, A novel coronavirus outbreak of global  
397 health concern. *Lancet* **395**, 470-473 (2020).
- 398 3. J. S. M. Peiris, K. Y. Yuen, A. D. M. E. Osterhaus, K. Stöhr, The Severe Acute Respiratory  
399 Syndrome. *N Engl J Med* **349**, 2431-2441 (2003).
- 400 4. M. Z. Tay, C. M. Poh, L. Rénia, P. A. MacAry, L. F. P. Ng, The trinity of COVID-19: immunity,  
401 inflammation and intervention. *Nat Rev Immunol* **20**, 363-374 (2020).
- 402 5. D. S. Hui, Tracking the transmission and evolution of MERS-CoV. *Lancet* **382**, 1962-1964  
403 (2013).
- 404 6. K.-S. Yuen, Z.-W. Ye, S.-Y. Fung, C.-P. Chan, D.-Y. Jin, SARS-CoV-2 and COVID-19: The  
405 most important research questions. *Cell Biosci* **10**, 40-40 (2020).
- 406 7. A. C. Walls, Y.-J. Park, M. A. Tortorici, A. Wall, A. T. McGuire, D. Velesler, Structure,  
407 Function, and Antigenicity of the SARS-CoV-2 Spike Glycoprotein. *Cell* **181**, 281-  
408 292.e286 (2020).
- 409 8. D. Wrapp, N. Wang, K. S. Corbett, J. A. Goldsmith, C.-L. Hsieh, O. Abiona, B. S. Graham,  
410 J. S. McLellan, Cryo-EM structure of the 2019-nCoV spike in the prefusion  
411 conformation. *Science* **367**, 1260-1263 (2020).
- 412 9. J. Shang, Y. Wan, C. Luo, G. Ye, Q. Geng, A. Auerbach, F. Li, Cell entry mechanisms of  
413 SARS-CoV-2. *Proc Natl Acad Sci USA* **117**, 11727-11734 (2020).
- 414 10. M. Hoffmann, H. Kleine-Weber, S. Schroeder, N. Krüger, T. Herrler, S. Erichsen, T. S.  
415 Schiergens, G. Herrler, N.-H. Wu, A. Nitsche, M. A. Müller, C. Drosten, S. Pöhlmann,  
416 SARS-CoV-2 Cell Entry Depends on ACE2 and TMPRSS2 and Is Blocked by a Clinically  
417 Proven Protease Inhibitor. *Cell* **181**, 271-280.e278 (2020).
- 418 11. J. Lan, J. Ge, J. Yu, S. Shan, H. Zhou, S. Fan, Q. Zhang, X. Shi, Q. Wang, L. Zhang, X. Wang,  
419 Structure of the SARS-CoV-2 spike receptor-binding domain bound to the ACE2  
420 receptor. *Nature* **581**, 215-220 (2020).
- 421 12. J. Shang, G. Ye, K. Shi, Y. Wan, C. Luo, H. Aihara, Q. Geng, A. Auerbach, F. Li, Structural  
422 basis of receptor recognition by SARS-CoV-2. *Nature* **581**, 221-224 (2020).
- 423 13. Q. Wang, Y. Zhang, L. Wu, S. Niu, C. Song, Z. Zhang, G. Lu, C. Qiao, Y. Hu, K.-Y. Yuen, Q.  
424 Wang, H. Zhou, J. Yan, J. Qi, Structural and Functional Basis of SARS-CoV-2 Entry by  
425 Using Human ACE2. *Cell* **181**, 894-904.e899 (2020).
- 426 14. R. Yan, Y. Zhang, Y. Li, L. Xia, Y. Guo, Q. Zhou, Structural basis for the recognition of  
427 SARS-CoV-2 by full-length human ACE2. *Science* **367**, 1444-1448 (2020).
- 428 15. M. Hoffmann, H. Kleine-Weber, S. Pöhlmann, A Multibasic Cleavage Site in the Spike



- 429 Protein of SARS-CoV-2 Is Essential for Infection of Human Lung Cells. *Mol Cell* **78**, 779-  
430 784.e775 (2020).
- 431 16. P. Prabakaran, J. Gan, Y. Feng, Z. Zhu, V. Choudhry, X. Xiao, X. Ji, D. S. Dimitrov, Structure  
432 of severe acute respiratory syndrome coronavirus receptor-binding domain  
433 complexed with neutralizing antibody. *The Journal of biological chemistry* **281**, 15829-  
434 15836 (2006).
- 435 17. E. Traggiai, S. Becker, K. Subbarao, L. Kolesnikova, Y. Uematsu, M. R. Gismondo, B. R.  
436 Murphy, R. Rappuoli, A. Lanzavecchia, An efficient method to make human  
437 monoclonal antibodies from memory B cells: potent neutralization of SARS  
438 coronavirus. *Nat Med* **10**, 871-875 (2004).
- 439 18. B. Rockx, D. Corti, E. Donaldson, T. Sheahan, K. Stadler, A. Lanzavecchia, R. Baric,  
440 Structural basis for potent cross-neutralizing human monoclonal antibody protection  
441 against lethal human and zoonotic severe acute respiratory syndrome coronavirus  
442 challenge. *J Virol* **82**, 3220-3235 (2008).
- 443 19. A. C. Walls, X. Xiong, Y.-J. Park, M. A. Tortorici, J. Snijder, J. Quispe, E. Cameroni, R.  
444 Gopal, M. Dai, A. Lanzavecchia, M. Zambon, F. A. Rey, D. Corti, D. Velesler, Unexpected  
445 Receptor Functional Mimicry Elucidates Activation of Coronavirus Fusion. *Cell* **176**,  
446 1026-1039.e1015 (2019).
- 447 20. D. Corti, N. Passini, A. Lanzavecchia, M. Zambon, Rapid generation of a human  
448 monoclonal antibody to combat Middle East respiratory syndrome. *J Infect Public Heal*  
449 **9**, 231-235 (2016).
- 450 21. P. Niu, S. Zhang, P. Zhou, B. Huang, Y. Deng, K. Qin, P. Wang, W. Wang, X. Wang, J. Zhou,  
451 L. Zhang, W. Tan, Ultrapotent Human Neutralizing Antibody Repertoires Against  
452 Middle East Respiratory Syndrome Coronavirus From a Recovered Patient. *J Infect Dis*  
453 **218**, 1249-1260 (2018).
- 454 22. Y. Wu, F. Wang, C. Shen, W. Peng, D. Li, C. Zhao, Z. Li, S. Li, Y. Bi, Y. Yang, Y. Gong, H. Xiao,  
455 Z. Fan, S. Tan, G. Wu, W. Tan, X. Lu, C. Fan, Q. Wang, Y. Liu, C. Zhang, J. Qi, G. F. Gao, F.  
456 Gao, L. Liu, A noncompeting pair of human neutralizing antibodies block COVID-19  
457 virus binding to its receptor ACE2. *Science*, eabc2241 (2020).
- 458 23. Y. Cao, B. Su, X. Guo, W. Sun, Y. Deng, L. Bao, Q. Zhu, X. Zhang, Y. Zheng, C. Geng, X.  
459 Chai, R. He, X. Li, Q. Lv, H. Zhu, W. Deng, Y. Xu, Y. Wang, L. Qiao, Y. Tan, L. Song, G. Wang,  
460 X. Du, N. Gao, J. Liu, J. Xiao, X.-d. Su, Z. Du, Y. Feng, C. Qin, C. Qin, R. Jin, X. S. Xie, Potent  
461 neutralizing antibodies against SARS-CoV-2 identified by high-throughput single-cell  
462 sequencing of convalescent patients' B cells. *Cell*, (2020).
- 463 24. B. Ju, Q. Zhang, J. Ge, R. Wang, J. Sun, X. Ge, J. Yu, S. Shan, B. Zhou, S. Song, X. Tang, J.  
464 Yu, J. Lan, J. Yuan, H. Wang, J. Zhao, S. Zhang, Y. Wang, X. Shi, L. Liu, J. Zhao, X. Wang,  
465 Z. Zhang, L. Zhang, Human neutralizing antibodies elicited by SARS-CoV-2 infection.  
466 *Nature*, (2020).

- 467 25. S. Muyldermans, Nanobodies: Natural Single-Domain Antibodies. *Annu Rev Biochem*  
468 **82**, 775-797 (2013).
- 469 26. I. Zimmermann, P. Egloff, C. A. J. Hutter, F. M. Arnold, P. Stohler, N. Bocquet, M. N. Hug,  
470 S. Huber, M. Siegrist, L. Hetemann, J. Gera, S. Gmür, P. Spies, D. Gygax, E. R. Geertsma,  
471 R. J. P. Dawson, M. A. Seeger, Synthetic single domain antibodies for the  
472 conformational trapping of membrane proteins. *eLife* **7**, e34317 (2018).
- 473 27. I. Zimmermann, P. Egloff, C. A. J. Hutter, B. T. Kuhn, P. Bräuer, S. Newstead, R. J. P.  
474 Dawson, E. R. Geertsma, M. A. Seeger, Generation of synthetic nanobodies against  
475 delicate proteins. *Nat Protoc* **15**, 1707-1741 (2020).
- 476 28. J. D. Walter, C. A. J. Hutter, I. Zimmermann, J. Earp, P. Egloff, M. Sorgenfrei, L. M.  
477 Hürlimann, I. Gonda, G. Meier, S. Remm, S. Thavarasah, P. Plattet, M. A. Seeger,  
478 Synthetic nanobodies targeting the SARS-CoV-2 receptor-binding domain. *bioRxiv*,  
479 2020.2004.2016.045419 (2020).
- 480 29. Y. Abdiche, D. Malashock, A. Pinkerton, J. Pons, Determining kinetics and affinities of  
481 protein interactions using a parallel real-time label-free biosensor, the Octet. *Anal*  
482 *Biochem* **377**, 209-217 (2008).
- 483 30. J. D. Brunner, R. P. Jakob, T. Schulze, Y. Neldner, A. Moroni, G. Thiel, T. Maier, S. Schenck,  
484 Structural basis for ion selectivity in TMEM175 K<sup>+</sup> channels. *eLife* **9**, e53683 (2020).
- 485 31. E. Krissinel, K. Henrick, Inference of Macromolecular Assemblies from Crystalline State.  
486 *J Mol Biol* **372**, 774-797 (2007).
- 487 32. X. Chi, R. Yan, J. Zhang, G. Zhang, Y. Zhang, M. Hao, Z. Zhang, P. Fan, Y. Dong, Y. Yang, Z.  
488 Chen, Y. Guo, J. Zhang, Y. Li, X. Song, Y. Chen, L. Xia, L. Fu, L. Hou, J. Xu, C. Yu, J. Li, Q.  
489 Zhou, W. Chen, A potent neutralizing human antibody reveals the N-terminal domain  
490 of the Spike protein of SARS-CoV-2 as a site of vulnerability. *bioRxiv*,  
491 2020.2005.2008.083964 (2020).
- 492 33. M. Yuan, N. C. Wu, X. Zhu, C.-C. D. Lee, R. T. Y. So, H. Lv, C. K. P. Mok, I. A. Wilson, A  
493 highly conserved cryptic epitope in the receptor binding domains of SARS-CoV-2 and  
494 SARS-CoV. *Science* **368**, 630-633 (2020).
- 495 34. D. Wrapp, D. De Vlieger, K. S. Corbett, G. M. Torres, N. Wang, W. Van Breedam, K. Roose,  
496 L. van Schie, M. Hoffmann, S. Pöhlmann, B. S. Graham, N. Callewaert, B. Schepens, X.  
497 Saelens, J. S. McLellan, Structural Basis for Potent Neutralization of Betacoronaviruses  
498 by Single-Domain Camelid Antibodies. *Cell* **181**, 1004-1015.e1015 (2020).
